# Supplementary material for: Analysis of fungal dynamic changes in the natural fermentation broth of ‘Hongyang’ kiwifruit
Source: PeerJ. 2022 Apr 19;10:e13286. doi: 10.7717/peerj.13286 (PMC9029446; doi:10.7717/peerj.13286)
Supplement: Supplemental Information 1 [file peerj-10-13286-s001.xlsx]

## Sheet: Sheet1
Annex 1 Classification of Fungi in the Fermentation Process of ‘Hongyang’ kiwifruit
Phylum	Class	Order	Family	Genus	Species	Entry Number	D1 T	D3 T	D5 T	D15 T	CK
Ascomycota	Arthoniomycetes	Lichenostigmatales	Phaeococcomycetaceae	Phaeococcomyces	unidentified	32644	+
	Dothideomycetes	Botryosphaeriales	Botryosphaeriaceae	Diplodia	allocellula	1126557	+
		Capnodiales	Mycosphaerellaceae	Mycosphaerella	Mycosphaerella tassiana	29918	+	+	+	+	+
				Neoceratosperma	Neoceratosperma yunnanensis	389369					+
				Septoria	Septoria cretae	1351869	+		+		+
			unclassified Capnodiales	unclassified Capnodiales	unclassified Capnodiales	515146	+
		Dothideales	Aureobasidiaceae	Aureobasidium	Aureobasidium pullulans	1213350	+	+	+	+	+
			Dothideales fam Incertae sedis	Selenophoma	Selenophoma mahoniae	559572	+		+
			unclassified Dothideales	unclassified Dothideales	unclassified Dothideales	127931	+
		Pleosporales	Coniothyriaceae	Coniothyrium	unidentified	32644	+
			Cucurbitariaceae	Pyrenochaeta	Pyrenochaeta acaciae	1871387	+
				Pyrenochaetopsis	Pyrenochaetopsis leptospora	798152	+				+
			Didymellaceae	Boeremia	Boeremia exigua	749465	+				+
				Calophoma	unidentified	32644	+
				Didymella	Didymella exigua	100019	+
					Didymella fabae	372025	+
					unclassified Didymella	2632349	+	+	+
				Epicoccum	Epicoccum draconis	749830	+	+		+
				Neoascochyta	Neoascochyta paspali	646068	+	+
				unclassified Didymellaceae	unclassified Didymellaceae	877205	+	+	+	+	+
			Didymosphaeriaceae	Didymosphaeria	unidentified	32644	+
				Paraconiothyrium	Paraconiothyrium archidendri	1460677	+
				Paraphaeosphaeria	unidentified	32644		+
				Pseudopithomyces	unidentified	32644	+
				Verrucoconiothyrium	Verrucoconiothyrium nitidae	531906	+
			Leptosphaeriaceae	Ampelomyces	Ampelomyces quisqualis	50730	+
			Periconiaceae	Periconia	Periconia byssoides	1382551	+
			Phaeosphaeriaceae	Leptospora	unidentified	32644	+
				Neosetophoma	Neosetophoma samararum	798069	+
				Sclerostagonospora	Sclerostagonospora lathyri	2134017	+
				Setomelanomma	Setomelanomma holmii	210430	+
				Setophoma	Setophoma chromolaenae	1351878	+
				unclassified Phaeosphaeriaceae	unclassified Phaeosphaeriaceae	119085	+				+
				Unidentified	unidentified	32644	+
			Pleosporaceae	Alternaria	Alternaria obovoidea	297638	+
					Alternaria subcucurbitae	576998	+
					unclassified Alternaria	2610821	+
					unidentified	32644	+	+	+	+	+
				Bipolaris	Bipolaris melinidis	1537982	+
				Curvularia	Curvularia pallescens	318706	+
				Stemphylium	Stemphylium vesicarium	119933	+
			Torulaceae	Torula	unclassified Torula	2648189	+
			unclassified Pleosporales	unclassified Pleosporales	unclassified Pleosporales	92862	+		+
		unclassified Dothideomycetes	unclassified Dothideomycetes	unclassified Dothideomycetes	unclassified Dothideomycetes	209473	+
	Eurotiomycetes	Eurotiales	Aspergillaceae	Aspergillus	Aspergillus flavus	5059			+	+
					Aspergillus fumigatus	746128				+
					Aspergillus japonicus	34381	+
					Aspergillus niger	5061	+
					Aspergillus penicillioides	41959			+
					unclassified Aspergillus	2606521	+
				Xeromyces	Xeromyces bisporus	89491	+	+
			Thermoascaceae	Thermoascus	Thermoascus crustaceus	5088				+
			Trichocomaceae	Xerochrysium	Xerochrysium dermatitidis	981174					+
	Leotiomycetes	Helotiales	Helotiaceae	Articulospora	unidentified	32644	+
				Scytalidium	Scytalidium cuboideum	266817		+
			Sclerotiniaceae	Monilinia	Monilinia laxa	61186	+	+		+	+
		Thelebolales	Thelebolaceae	Thelebolus	Thelebolus globosus	319062				+
	Pezizomycetes	Pezizales	Pyronemataceae	unclassified Pyronemataceae	unclassified Pyronemataceae	137269	+
				Unidentified	unidentified	32644	+		+
	Saccharomycetes	Saccharomycetales	Debaryomycetaceae	Debaryomyces	Debaryomyces prosopidis	148098	+
				Hyphopichia	Hyphopichia burtonii	717740					+
				Meyerozyma	Meyerozyma guilliermondii	4929	+	+	+	+
			Dipodascaceae	Dipodascus	Dipodascus geotrichum	43987		+	+	+
				unclassified Dipodascaceae	unclassified Dipodascaceae	221740		+		+
				Unidentified	unidentified	32644		+	+	+
			Phaffomycetaceae	Wickerhamomyces	Wickerhamomyces anomalus	4927	+
			Pichiaceae	Pichia	Pichia kluyveri	36015	+	+	+	+	+
					Pichia mandshurica	121235		+	+	+
					Pichia membranifaciens	4926	+	+	+	+	+
					Pichia terricola	54551	+	+	+	+	+
					unidentified	32644		+	+	+
			Saccharomycetaceae	Citeromyces	Citeromyces matritensis	36909	+		+
				Torulaspora	Torulaspora delbrueckii	4950	+	+	+	+
				Unidentified	unidentified	32644	+	+
			Saccharomycetales fam Incertae sedis	Candida	Candida quercitrusa	880181	+	+	+	+
					Candida railenensis	45579	+	+	+
				Starmerella	Starmerella bacillaris	1247836	+			+
			Saccharomycodaceae	Hanseniaspora	Hanseniaspora nectarophila	1443074	+		+
			Trichomonascaceae	Wickerhamiella	unidentified	32644					+
			unclassified Saccharomycetales	unclassified Saccharomycetales	unclassified Saccharomycetales	311473				+	+
			unidentified	unidentified	unidentified	32644	+	+	+	+	+
	Sordariomycetes	Diaporthales	Diaporthaceae	Diaporthe	Diaporthe lusitanicae	573504	+
					unclassified Diaporthe	2604179	+				+
			Valsaceae	Cryptosphaeria	Cryptosphaeria subcutanea	140170				+
				Valsa	Valsa mali	105487	+	+	+
		Glomerellales	Plectosphaerellaceae	Lectera	Lectera longa	1208926					+
					unclassified Lectera	2629896	+	+
				Plectosphaerella	Plectosphaerella oratosquillae	1683809					+
					unclassified Plectosphaerella	2627971	+		+
				Verticillium	Verticillium klebahnii	1051615					+
					Verticillium leptobactrum	93594	+				+
		Hypocreales	Clavicipitaceae	Metarhizium	Metarhizium rileyi	1649241	+
			Cordycipitaceae	Cordyceps	Cordyceps bassiana	176275	+
			Hypocreales fam Incertae sedis	Acremonium	Acremonium alternatum	45275	+	+	+	+	+
					Acremonium charticola	148958	+
					Acremonium furcatum	2710536	+		+
					Acremonium fusidioides	749674	+				+
					Acremonium hyalinulum	1036796	+
				Fusariella	unidentified	32644	+
				Sarocladium	Sarocladium bacillisporum	1036728	+
					Sarocladium implicatum	1610689	+
					Sarocladium strictum	5046	+		+		+
					Sarocladium summerbellii	1610693	+	+			+
					unclassified Sarocladium	2625648			+
				Trichothecium	Trichothecium roseum	47278	+	+			+
			Nectriaceae	Fusarium	unclassified Fusarium	2593666	+				+
				Gibberella	Gibberella intricans	61235	+	+	+	+
				unclassified Nectriaceae	unclassified Nectriaceae	359652	+
			unidentified	unidentified	unidentified	32644	+				+
		Microascales	Microascaceae	Lophotrichus	Lophotrichus fimeti	70117	+	+		+
		Sordariales	Chaetomiaceae	unidentified	unidentified	32644		+	+	+
		Trichosphaeriales	Trichosphaeriaceae	Nigrospora	Nigrospora oryzae	335854	+
		Xylariales	Apiosporaceae	Arthrinium	Arthrinium thailandicum	1812718	+
			Microdochiaceae	Idriella	unidentified	32644	+
			Xylariales fam Incertae sedis	Phialemoniopsis	Phialemoniopsis curvata	1093900				+	+
				Robillarda	Robillarda sessilis	635208		+
		unclassified Sordariomycetes	unclassified Sordariomycetes	unclassified Sordariomycetes	unclassified Sordariomycetes	150498	+	+	+
	unclassified Ascomycota	unclassified Ascomycota	unclassified Ascomycota	unclassified Ascomycota	unclassified Ascomycota	45426	+		+		+
Basidiobolomycota	Basidiobolomycetes	Basidiobolales	Basidiobolaceae	Basidiobolus	unclassified Basidiobolus	2621805	+
	Agaricomycetes	Agaricales	Entolomataceae	Clitopilus	Clitopilus hobsonii	648681	+
			Hygrophoraceae	Hygrophorus	Hygrophorus persicolor	1032768			+
			Psathyrellaceae	Coprinellus	Coprinellus ellisii	1608982	+
				Coprinopsis	Coprinopsis calospora	752676	+	+
					Coprinopsis candidolanata	575501	+
					Coprinopsis urticicola	979882	+
		Polyporales	Polyporaceae	Fomes	Fomes fomentarius	40442	+			+
	Cystobasidiomycetes	Cystobasidiomycetes ord Incertae sedis	Symmetrosporaceae	Symmetrospora	Symmetrospora coprosmae	69976	+
		Erythrobasidiales	Erythrobasidiaceae	Bannoa	unclassified Bannoa	2640853	+
				Erythrobasidium	Erythrobasidium hasegawianum	5414	+
		unclassified Cystobasidiomycetes	unclassified Cystobasidiomycetes	unclassified Cystobasidiomycetes	unclassified Cystobasidiomycetes	1615853	+
	Exobasidiomycetes	Microstromatales	Microstromataceae	Microstroma	Microstroma album	157250	+
					unidentified	32644	+
			unclassified Microstromatales	unclassified Microstromatales	unclassified Microstromatales	422682	+
	Malasseziomycetes	Malasseziales	Malasseziaceae	Malassezia	Malassezia restricta	76775	+
			unidentified	unidentified	unidentified	32644	+
	Microbotryomycetes	Microbotryomycetes ord Incertae sedis	Chrysozymaceae	Sampaiozyma	Sampaiozyma vanillica	106020	+
		Sporidiobolales	Sporidiobolaceae	Rhodotorula	unclassified Rhodotorula	2640191	+
				Sporobolomyces	Sporobolomyces koalae	500713	+
	Tremellomycetes	Cystofilobasidiales	Cystofilobasidiaceae	Cystofilobasidium	Cystofilobasidium capitatum	5412	+
		Filobasidiales	Filobasidiaceae	Filobasidium	Filobasidium chernovii	104404	+
					Filobasidium magnum	104409	+	+	+	+
					unidentified	32644	+
				Naganishia	Naganishia albida	100951	+		+
					Naganishia diffluens	89919	+	+
					Naganishia globosa	104412	+
					Naganishia randhawae	312146	+
			Piskurozymaceae	Solicoccozyma	Solicoccozyma terrea	40409			+
		Tremellales	Bulleraceae	Genolevuria	unidentified	32644	+
			Bulleribasidiaceae	Dioszegia	Dioszegia zsoltii var. yunnanensis	183970	+
				Hannaella	Hannaella luteola	1198485	+
					Hannaella oryzae	4979	+				+
					Hannaella zeae	325170	+		+		+
				Vishniacozyma	Vishniacozyma carnescens	214994	+
					Vishniacozyma dimennae	89920				+	+
					Vishniacozyma heimaeyensis	159573					+
					Vishniacozyma taibaiensis	266793	+
					Vishniacozyma victoriae	1895944	+			+
					unidentified	32644	+				+
			Cryptococcaceae	Kwoniella	unclassified Kwoniella	2617901	+
			Cuniculitremaceae	Kockovaella	unclassified Kockovaella	2643353	+
			Rhynchogastremataceae	Papiliotrema	Papiliotrema flavescens	214993	+	+	+	+	+
					Papiliotrema laurentii	5418	+	+	+
					unclassified Papiliotrema	2627096	+
			Tremellaceae	Cryptococcus	Cryptococcus cuniculi	79213	+
					unidentified	32644	+
			Trimorphomycetaceae	Saitozyma	Saitozyma paraflava	257870	+		+
		Trichosporonales	Trichosporonaceae	Cutaneotrichosporon	Cutaneotrichosporon smithiae	1105093					+
					unidentified	32644			+
	Ustilaginomycetes	Ustilaginales	Ustilaginales fam Incertae sedis	Farysizyma	unidentified	32644	+
	Wallemiomycetes	Wallemiales	Wallemiaceae	Wallemia	Wallemia muriae	245175	+
					unclassified Wallemia	2639014	+				+
	unclassified Basidiomycota	unclassified Basidiomycota	unclassified Basidiomycota	unclassified Basidiomycota	unclassified Basidiomycota	38240	+
Chytridiomycota	Rhizophlyctidomycetes	Rhizophlyctidales	Rhizophlyctidaceae	Rhizophlyctis	Rhizophlyctis rosea	64517	+
Mortierellomycota	Mortierellomycetes	Mortierellales	Mortierellaceae	Mortierella	Mortierella hypsicladia	979710	+
Mucoromycota	Mucoromycetes	Mucorales	Mucoraceae	Mucor	Mucor bainieri	1095379	+
					unclassified Mucor	2621539	+
unclassified Fungi	unclassified Fungi	unclassified Fungi	unclassified Fungi	unclassified Fungi	unclassified Fungi	89443	+	+	+	+	+
unidentified	unidentified	unidentified	unidentified	unidentified	unidentified	32644	+	+	+	+	+
note：The left side represents the biological classification level, and the right side represents each sample."+" indicates the presence of the species in the sample.
